# Supplementary material
Source: PubMed Central journal article supplement (PMC5009958)
Supplement: supp_msv119_Figure_S2.pdf [file supp_msv119_Figure_S2.pdf]

### In-gene IS insertion positions (*D. radiodurans*)

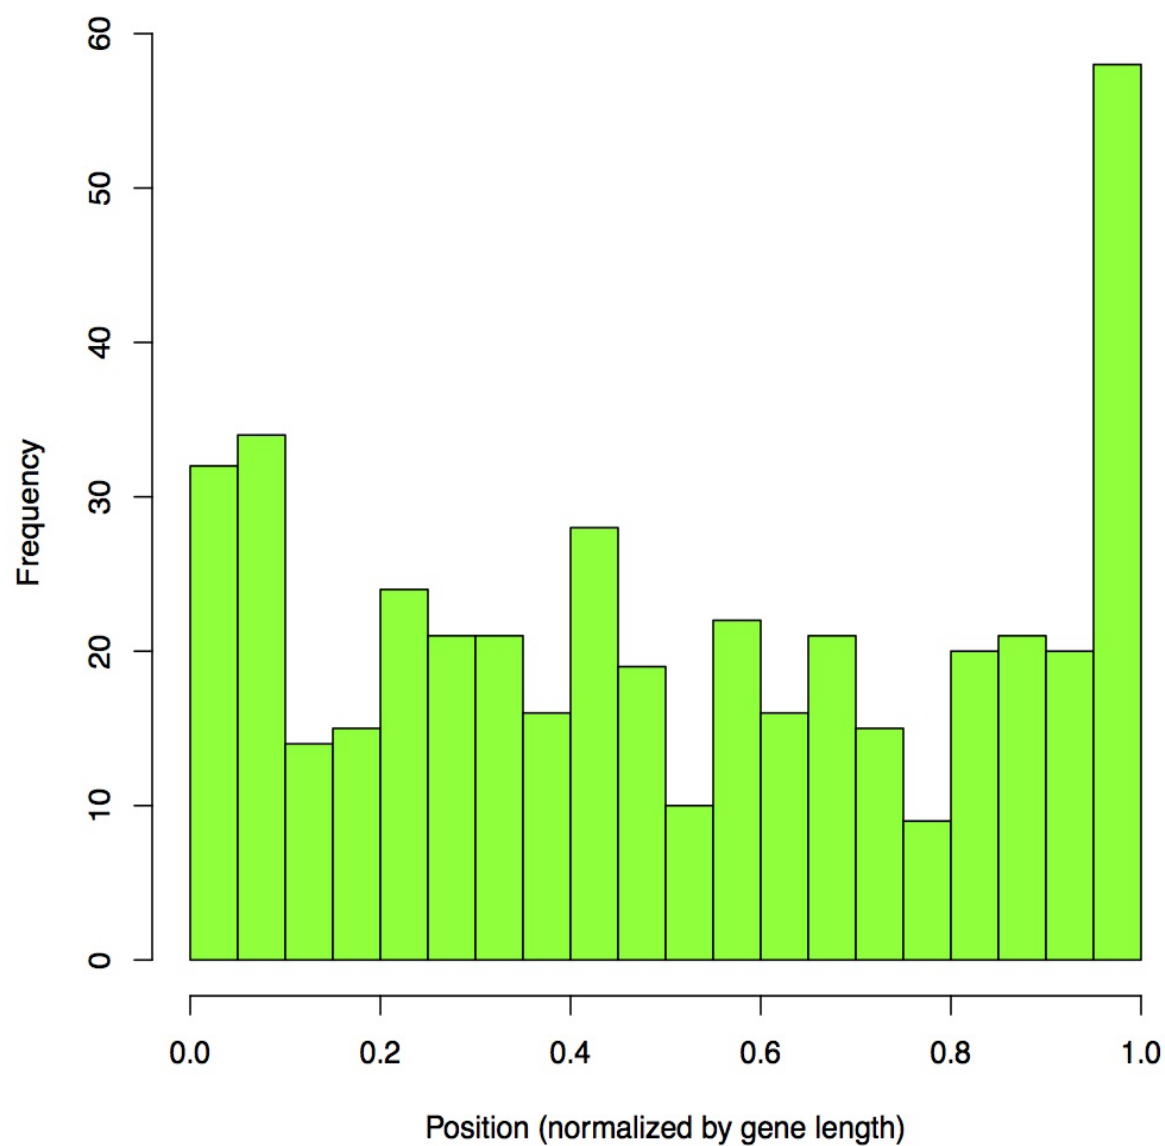

**Figure S2.** In-gene IS insertion positions from wild-type lines. For each in-gene insertion recovered in wild-type lines, relative distance from 5' end of gene is calculated by dividing the length of the gene. Histogram of relative positions for all in-gene insertions are shown with bin size of 0.05.
